# Supplementary material for: Kinetic parameters of Scenedesmus obliquus (Chlorophyceae) growth and yield under different cultivation conditions in vitro
Source: PeerJ. 2025 Aug 11;13:e17879. doi: 10.7717/peerj.17879 (PMC12352415; doi:10.7717/peerj.17879)
Supplement: Supplemental Information 1 [file peerj-13-17879-s001.xls]

## Sheet: General
Assay	Day 0	Day 1	Day 2	Day 3	Day 4	Day 5	Day 6	Day 7	Day 8	Day 9	Day 10	Day 11	Day 12	Day 13	Day 14	Day 15
1	117	167	261	431	477	432	466	437	409	387	427	422	390	418	389	478
2	117	194	189	351	378	466	448.5	434	417	371	415	393	387	392	363	341
3	117	187	176	209	288	372	397	406	389	357	342	317	323	339.5	298	287
4	117	222	239	270	375	431	426.5	442	424	382	312	274	297	273	314	287
5	117	235	271	218	253	289	321	356	476	367	441	398	393	304	287	222
6	117	161	332	483	638	647	581.5	489	476	526	358	357	407	398	349	166
7	117	182	216	264	289	327	351.5	364	367	378	297	305	325	295.5	322	221
8	117	217	183	267	237	329	331.5	315	324	339	426	402	422	372	375	337
9	117	233	459	868	823	1027	963	997	890	767	798	923	943	1199	1356	1299
Assay	Day 0	Day 1	Day 2	Day 3	Day 4	Day 5	Day 6	Day 7	Day 8	Day 9	Day 10	Day 11	Day 12	Day 13	Day 14	Day 15
1	117	213	279	389	423	498	424	413	371	323	403	392	406	385	421	452
2	117	172	205	327	362	432	416.5	398	386	403	371	363	345	352	393	397
3	117	157	194	231	332	398	375	368	341	329	312	279	293	281.5	328	307
4	117	176	221	310	405	409	416.5	404	396	412	282	238	259	308	292	303
5	117	205	209	282	287	301	294	384	424	393	389	358	353	264	203	208
6	117	219	288	457	602	663	543.5	451	504	494	312	315	371	356	381	124
7	117	146	178	296	305	353	331.5	322	331	332	275	273	293	322.5	296	253
8	117	163	215	219	277	321	295.5	289	295	295	374	368	384	423	409	373
9	117	267	441	832	847	1003	1027	953	825	713	762	871	869	1022	1274	1141
Assay	Day 0	Day 1	Day 2	Day 3	Day 4	Day 5	Day 6	Day 7	Day 8	Day 9	Day 10	Day 11	Day 12	Day 13	Day 14	Day 15
1	117	190	270	410	450	465	445	425	390	355	415	407	398	401.5	405	465
2	117	183	197	339	370	449	432.5	416	401.5	387	393	378	366	372	378	369
3	117	172	185	220	310	385	386	387	365	343	327	298	308	310.5	313	297
4	117	199	230	290	390	420	421.5	423	410	397	297	256	278	290.5	303	295
5	117	220	240	250	270	295	307.5	370	450	380	415	378	373	284	245	215
6	117	190	310	470	620	655	562.5	470	490	510	335	336	389	377	365	145
7	117	164	197	280	297	340	341.5	343	349	355	286	289	309	309	309	237
8	117	190	199	243	257	325	313.5	302	309.5	317	400	385	403	397.5	392	355
9	117	250	450	850	835	1015	995	975	857.5	740	780	897	906	1110.5	1315	1220
Assay	Day 0	Day 1	Day 2	Day 3	Day 4	Day 5	Day 6	Day 7	Day 8	Day 9	Day 10	Day 11	Day 12	Day 13	Day 14	Day 15
1	0	32.5269	12.7279	29.6985	38.1838	46.669	29.6985	16.9706	26.8701	45.2548	16.9706	21.2132	11.3137	23.3345	22.6274	18.3848
2	0	15.5563	11.3137	16.9706	11.3137	24.0416	22.6274	25.4558	21.9203	22.6274	31.1127	21.2132	29.6985	28.2843	21.2132	39.598
3	0	21.2132	12.7279	15.5563	31.1127	18.3848	15.5563	26.8701	33.9411	19.799	21.2132	26.8701	21.2132	41.0122	21.2132	14.1421
4	0	32.5269	12.7279	28.2843	21.2132	15.5563	7.07107	26.8701	19.799	21.2132	21.2132	25.4558	26.8701	24.7487	15.5563	11.3137
5	0	21.2132	43.8406	45.2548	24.0416	8.48528	19.0919	19.799	36.7696	18.3848	36.7696	28.2843	28.2843	28.2843	59.397	9.89949
6	0	41.0122	31.1127	18.3848	25.4558	11.3137	26.8701	26.8701	19.799	22.6274	32.5269	29.6985	25.4558	29.6985	22.6274	29.6985
7	0	25.4558	26.8701	22.6274	11.3137	18.3848	14.1421	29.6985	25.4558	32.5269	15.5563	22.6274	22.6274	19.0919	18.3848	22.6274
8	0	38.1838	22.6274	33.9411	28.2843	5.65685	25.4558	18.3848	20.5061	31.1127	36.7696	24.0416	26.8701	36.0624	24.0416	25.4558
9	0	24.0416	12.7279	25.4558	16.9706	16.9706	45.2548	31.1127	45.9619	38.1838	25.4558	36.7696	52.3259	125.158	57.9828	111.723

## Sheet:  Yield
Assay	Day 0	Day 1	Day 2	Day 3	Day 4	Day 5	Day 6	Day 7	Day 8	Day 9	Day 10	Day 11	Day 12	Day 13	Day 14	Day 15
1	117	167	261	431	477	432	466	437	409	387	427	422	390	418	389	478
2	117	194	189	351	378	466	448.5	434	417	371	415	393	387	392	363	341
3	117	187	176	209	288	372	397	406	389	357	342	317	323	339.5	298	287
4	117	222	239	270	375	431	426.5	442	424	382	312	274	297	273	314	287
5	117	235	271	418	253	289	421	556	476	367	541	498	493	304	187	122
6	117	161	332	483	638	647	581.5	489	476	526	358	357	407	398	349	166
7	117	182	216	264	289	327	351.5	364	367	378	297	305	325	295.5	322	221
8	117	217	183	267	237	329	331.5	315	324	339	426	402	422	372	375	337
9	117	233	259	868	823	1027	963	997	890	767	798	923	943	1199	1356	1299
Assay
1	58.1667
2	69.8
3	41.2857
4	46.4286
5	62.7143
6	106
7	29
8	30.9
9	182
Assay	Day 0	Day 1	Day 2	Day 3	Day 4	Day 5	Day 6	Day 7	Day 8	Day 9	Day 10	Day 11	Day 12	Day 13	Day 14	Day 15
1	117	213	279	389	423	498	424	413	371	323	403	392	406	385	421	452
2	117	172	205	327	362	432	416.5	398	386	403	371	363	345	352	393	397
3	117	157	194	231	332	398	375	368	341	329	312	279	293	281.5	328	307
4	117	176	221	310	405	409	416.5	404	396	412	282	238	259	308	292	303
5	117	205	209	382	287	301	394	484	424	393	489	458	453	264	203	108
6	117	219	288	457	602	663	543.5	451	504	494	312	315	371	356	381	124
7	117	146	178	296	305	353	331.5	322	331	332	275	273	293	322.5	296	253
8	117	163	215	219	277	321	295.5	289	295	295	374	368	384	423	409	373
9	117	267	241	832	847	1003	1027	953	825	713	762	871	869	1022	1274	1141
Assay
1	51.1667
2	63
3	35.8571
4	41
5	52.4286
6	109.2
7	23.8889
8	25.7
9	177.2
Assay	Mean	SD
1	54.6667	4.94975
2	66.4	4.80833
3	38.5714	3.83858
4	43.7143	3.83858
5	57.5714	7.2731
6	107.6	2.26274
7	26.4444	3.6141
8	28.3	3.67696
9	179.6	3.39411

## Sheet: General Data Biokinetics_mean
Ensaio	Day 0	Day 1	Day 2	Day 3	Day 4	Day 5	Day 6	Day 7	Day 8	Day 9	Day 10	Day 11	Day 12	Day 13	Day 14	Day 15
1	117	190	270	410	450	465	445	425	390	355	415	407	398	401.5	405	465
2	117	183	197	339	370	449	432.5	416	401.5	387	393	378	366	372	378	369
3	117	172	185	220	310	385	386	387	365	343	327	298	308	310.5	313	297
4	117	199	230	290	390	420	421.5	423	410	397	297	256	278	290.5	303	295
5	117	220	240	400	270	295	407.5	520	450	380	515	478	473	284	195	115
6	117	190	310	470	620	655	562.5	470	490	510	335	336	389	377	365	145
7	117	164	197	280	297	340	341.5	343	349	355	286	289	309	309	309	237
8	117	190	199	243	257	325	313.5	302	309.5	317	400	385	403	397.5	392	355
9	117	250	250	850	835	1015	995	975	857.5	740	780	897	906	1110.5	1315	1220
Ensaio	Day 0	Day 1	Day 2	Day 3	Day 4	Day 5	Day 6	Day 7	Day 8	Day 9	Day 10	Day 11	Day 12	Day 13	Day 14	Day 15
1	0.0117	0.019	0.027	0.041	0.045	0.0465	0.0445	0.0425	0.039	0.0355	0.0415	0.0407	0.0398	0.04015	0.0405	0.0465
2	0.0117	0.0183	0.0197	0.0339	0.037	0.0449	0.04325	0.0416	0.04015	0.0387	0.0393	0.0378	0.0366	0.0372	0.0378	0.0369
3	0.0117	0.0172	0.0185	0.022	0.031	0.0385	0.0386	0.0387	0.0365	0.0343	0.0327	0.0298	0.0308	0.03105	0.0313	0.0297
4	0.0117	0.0199	0.023	0.029	0.039	0.042	0.04215	0.0423	0.041	0.0397	0.0297	0.0256	0.0278	0.02905	0.0303	0.0295
5	0.0117	0.022	0.024	0.04	0.027	0.0295	0.04075	0.052	0.045	0.038	0.0515	0.0478	0.0473	0.0284	0.0195	0.0115
6	0.0117	0.019	0.031	0.047	0.062	0.0655	0.05625	0.047	0.049	0.051	0.0335	0.0336	0.0389	0.0377	0.0365	0.0145
7	0.0117	0.0164	0.0197	0.028	0.0297	0.034	0.03415	0.0343	0.0349	0.0355	0.0286	0.0289	0.0309	0.0309	0.0309	0.0237
8	0.0117	0.019	0.0199	0.0243	0.0257	0.0325	0.03135	0.0302	0.03095	0.0317	0.04	0.0385	0.0403	0.03975	0.0392	0.0355
9	0.0117	0.025	0.025	0.085	0.0835	0.1015	0.0995	0.0975	0.08575	0.074	0.078	0.0897	0.0906	0.11105	0.1315	0.122

## Sheet: Mean_SD
Assay	Day 0	Day 1	SD	Day 2	SD	Day 3	SD	Day 4	SD	Day 5	SD	Day 6	SD	Day 7	SD	Day 8	SD	Day 9	SD	Day 10	SD	Day 11	SD	Day 12	SD	Day 13	SD	Day 14	SD	Day 15	SD
1	117	190	32.5269	270	12.7279	410	29.6985	450	38.1838	465	46.669	445	29.6985	425	16.9706	390	26.8701	355	45.2548	415	16.9706	407	21.2132	398	11.3137	401.5	23.3345	405	22.6274	465	18.3848
2	117	183	15.5563	197	11.3137	339	16.9706	370	11.3137	449	24.0416	432.5	22.6274	416	25.4558	401.5	21.9203	387	22.6274	393	31.1127	378	21.2132	366	29.6985	372	28.2843	378	21.2132	369	39.598
3	117	172	21.2132	185	12.7279	220	15.5563	310	31.1127	385	18.3848	386	15.5563	387	26.8701	365	33.9411	343	19.799	327	21.2132	298	26.8701	308	21.2132	310.5	41.0122	313	21.2132	297	14.1421
4	117	199	32.5269	230	12.7279	290	28.2843	390	21.2132	420	15.5563	421.5	7.07107	423	26.8701	410	19.799	397	21.2132	297	21.2132	256	25.4558	278	26.8701	290.5	24.7487	303	15.5563	295	11.3137
5	117	220	21.2132	240	43.8406	400	25.4558	270	24.0416	295	8.48528	407.5	19.0919	520	50.9117	450	36.7696	380	18.3848	515	36.7696	478	28.2843	473	28.2843	284	28.2843	195	11.3137	115	9.89949
6	117	190	41.0122	310	31.1127	470	18.3848	620	25.4558	655	11.3137	562.5	26.8701	470	26.8701	490	19.799	510	22.6274	335	32.5269	336	29.6985	389	25.4558	377	29.6985	365	22.6274	145	29.6985
7	117	164	25.4558	197	26.8701	280	22.6274	297	11.3137	340	18.3848	341.5	14.1421	343	29.6985	349	25.4558	355	32.5269	286	15.5563	289	22.6274	309	22.6274	309	19.0919	309	18.3848	237	22.6274
8	117	190	38.1838	199	22.6274	243	33.9411	257	28.2843	325	5.65685	313.5	25.4558	302	18.3848	309.5	20.5061	317	31.1127	400	36.7696	385	24.0416	403	26.8701	397.5	36.0624	392	24.0416	355	25.4558
9	117	250	24.0416	250	12.7279	850	25.4558	835	16.9706	1015	16.9706	995	45.2548	975	31.1127	857.5	45.9619	740	38.1838	780	25.4558	897	36.7696	906	52.3259	1110.5	125.158	1315	57.9828	1220	111.723

## Sheet: Data Biokinetics
Assay	E1pH1T2C1	E2pH2T1C2	E3pH1T3C1	E4pH3T1C1	E5pH3T2C1	E6pH1T2C3	E7pH3T3C3	E8pH1T3C3	E9pH3T2C3
Day 0	117	117	117	117	117	117	117	117	117
Day 1	190	183	172	199	220	190	164	190	250
Day 2	270	197	185	230	240	310	197	199	250
Day 3	410	339	220	290	400	470	280	243	850
Day 4	450	370	310	390	270	620	297	257	835
Day 5	465	449	385	420	295	655	340	325	1015
Day 6	445	432.5	386	421.5	407.5	562.5	341.5	313.5	995
Day 7	425	416	387	423	520	470	343	302	975
Day 8	390	401.5	365	410	450	490	349	309.5	857.5
Day 9	355	387	343	397	380	510	355	317	740
Day 10	415	393	327	297	515	335	286	400	780
Day 11	407	378	298	256	478	336	289	385	897
Day 12	398	366	308	278	473	389	309	403	906
Day 13	401.5	372	310.5	290.5	284	377	309	397.5	1110.5
Day 14	405	378	313	303	195	365	309	392	1315
Day 15	465	369	297	295	115	145	237	355	1220

## Sheet: Equations
Analysis and Preparation of Equations
												t	E1pH5T24C12	Model	No =	117		t	ln(E1pH1T2C1/Max)																					t	E1pH5T24C12	E2pH7T21C16	E3pH5T28C12	E4pH9T28C12	E5pH9T24C12	E6pH5T24C20	E7pH9T28C20	E8pH5T28C20	E9pH9T24C20
												1	117	149.818	Mu (dia-1) =	0.3463		1	-1.37986																					1	149.818	143.945	135.603	141.881	133.339	163.385	136.022	132.667	181.766
												2	190	186.898	Nmax =	465		2	-0.895013																					2	186.898	173.846	155.448	169.101	150.036	220.619	155.973	149.335	271.542
												3	270	226.558	T = ln 2/Mu	2.00158		3	-0.543615																					3	226.558	205.769	176.147	197.827	166.669	286.229	176.321	166.806	385.163
												4	410	266.567	Teta =	-1.09003		4	-0.12588																					4	266.567	238.473	197.233	227.019	182.82	355.387	196.49	184.832	513.489
												5	450	304.615				5	-0.0327898																					5	304.615	270.592	218.207	255.563	198.119	422.127	215.922	203.13	641.054
												6	465	338.821				6	0																					6	338.821	300.855	238.577	282.443	212.277	481.269	234.14	221.402	752.744
												7	445	368.054				7	-0.0439631																					7	368.054	328.275	257.908	306.875	225.095	529.843	250.789	239.349	840.172
												8	425	391.973				8	-0.0899482																					8	391.973	352.252	275.854	328.374	236.475	567.311	265.65	256.694	902.799
												9	390	410.86				9	-0.175891																					9	410.86	372.576	292.179	346.763	246.402	594.836	278.642	273.198	944.864
												10	355	425.355				10	-0.26992																					10	425.355	389.353	306.754	362.112	254.931	614.34	289.793	288.669	971.911
												11	415	436.242				11	-0.113759																					11	436.242	402.903	319.553	374.665	262.162	627.811	299.213	302.971	988.817
												12	407	444.284				12	-0.133224																					12	444.284	413.654	330.63	384.76	268.226	636.949	307.067	316.024	999.198
												13	398	450.154				13	-0.155585																					13	450.154	422.065	340.095	392.771	273.262	643.075	313.543	327.796	1005.5
												14	401.5	454.4				14	-0.14683																					14	454.4	428.574	348.097	399.06	277.414	647.147	318.833	338.301	1009.31
												15	405	457.453				15	-0.13815																					15	457.453	433.567	354.799	403.956	280.813	649.84	323.122	347.586	1011.59
												16	465	459.636				16	0																					16	459.636	437.373	360.37	407.742	283.583	651.614	326.578	355.725	1012.96
												t	E2pH7T21C16	Model	No =	117		t	E2pH2T1C2
Mu = growth velocity coefficient												1	117	143.945	Mu (dia-1) =	0.2919		1	-1.34485
maximum specificity (day-1) as a special case of												2	183	173.846	Nmax =	449		2	-0.897537
1st order constant k.												3	197	205.769	T = ln 2/Mu	2.3746		3	-0.823819
												4	339	238.473	Teta =	-1.04296		4	-0.281023
Describes the condition where an entire complement												5	370	270.592				5	-0.19352
reserve energy can be directed towards growth												6	449	300.855				6	0
ment, not being affected by overpopulation												7	432.5	328.275				7	-0.0374406
												8	416	352.252				8	-0.0763376
												9	401.5	372.576				9	-0.111815
												10	387	389.353				10	-0.148598
SUBTITLE												11	393	402.903				11	-0.133213
												12	378	413.654				12	-0.172129
No = initial cell density												13	366	422.065				13	-0.20439
Mu = growth velocity coefficient												14	372	428.574				14	-0.188129
Nmax = maximum estimated cell count												15	378	433.567				15	-0.172129
T= doubling time												16	369	437.373				16	-0.196226
												t	E3pH5T28C12	Model	No =	117		t	ln(E3pH1T3C1/Max)
												1	117	135.603	Mu (dia-1) =	0.2195		1	-1.19107
												2	172	155.448	Nmax =	385		2	-0.805749
												3	185	176.147	T = ln 2/Mu	3.15785		3	-0.732888
												4	220	197.233	Teta =	-0.828813		4	-0.559616
												5	310	218.207				5	-0.216671
												6	385	238.577				6	0
												7	386	257.908				7	0.00259404
												8	387	275.854				8	0.00518136
												9	365	292.179				9	-0.053346
												10	343	306.754				10	-0.115513
												11	327	319.553				11	-0.163283
												12	298	330.63				12	-0.25615
												13	308	340.095				13	-0.223144
												14	310.5	348.097				14	-0.215059
												15	313	354.799				15	-0.20704
												16	297	360.37				16	-0.259511
												t	E4pH9T28C12	Model	No =	117		t	E4pH3T1C1
												1	117	141.881	Mu (dia-1) =	0.2785		1	-1.27808
												2	199	169.101	Nmax =	420		2	-0.74695
												3	230	197.827	T = ln 2/Mu	2.48886		3	-0.602175
												4	290	227.019	Teta =	-0.951559		4	-0.370374
												5	390	255.563				5	-0.074108
												6	420	282.443				6	0
												7	421.5	306.875				7	0.00356507
												8	423	328.374				8	0.00711747
												9	410	346.763				9	-0.0240976
												10	397	362.112				10	-0.0563184
												11	297	374.665				11	-0.346523
												12	288	384.76				12	-0.377294
												13	278	392.771				13	-0.412634
												14	290.5	399.06				14	-0.368651
												15	303	403.956				15	-0.326522
												16	295	407.742				16	-0.353279
												t	E5pH9T24C12	Model	No =	117		t	E5pH3T2C1
												1	117	133.339	Mu (dia-1) =	0.227		1	-0.924801
												2	220	150.036	Nmax =	295		2	-0.293348
												3	240	166.669	T = ln 2/Mu	3.05351		3	-0.206336
												4	290	182.82	Teta =	-0.41961		4	-0.0170944
												5	270	198.119				5	-0.0885534
												6	295	212.277				6	0
												7	307.5	225.095				7	0.0414997
												8	420	236.475				8	0.353279
												9	450	246.402				9	0.422272
												10	380	254.931				10	0.253196
												11	415	262.162				11	0.341303
												12	378	268.226				12	0.247919
												13	373	273.262				13	0.234603
												14	284	277.414				14	-0.0380011
												15	245	280.813				15	-0.185717
												16	215	283.583				16	-0.316337
												t	E6pH5T24C20	Model	No =	117		t	E6pH1T2C3
												1	117	163.385	Mu (dia-1) =	0.4241		1	-1.72246
												2	190	220.619	Nmax =	655		2	-1.23761
												3	310	286.229	T = ln 2/Mu	1.6344		3	-0.748063
												4	470	355.387	Teta =	-1.52568		4	-0.331903
												5	620	422.127				5	-0.0549158
												6	655	481.269				6	0
												7	562.5	529.843				7	-0.152244
												8	470	567.311				8	-0.331903
												9	490	594.836				9	-0.29023
												10	460	614.34				10	-0.353409
												11	335	627.811				11	-0.670505
												12	336	636.949				12	-0.667524
												13	366	643.075				13	-0.582002
												14	377	647.147				14	-0.55239
												15	365	649.84				15	-0.584738
												16	145	651.614				16	-1.5079
												t	E7pH9T28C20	Model	No =	117		t	E7pH3T3C3
												1	117	136.022	Mu (dia-1) =	0.2398		1	-1.06677
												2	164	155.973	Nmax =	340		2	-0.729079
												3	197	176.321	T = ln 2/Mu	2.89052		3	-0.545742
												4	280	196.49	Teta =	-0.644998		4	-0.194156
												5	297	215.922				5	-0.135213
												6	340	234.14				6	0
												7	341.5	250.789				7	0.00440206
												8	343	265.65				8	0.00878483
												9	349	278.642				9	0.0261263
												10	355	289.793				10	0.0431722
												11	286	299.213				11	-0.172954
												12	289	307.067				12	-0.162519
												13	309	313.543				13	-0.0956043
												14	309	318.833				14	-0.0956043
												15	309	323.122				15	-0.0956043
												16	237	326.578				16	-0.360885
												t	E8pH5T28C20	Model	No =	117		t	E8pH1T3C3
												1	117	132.667	Mu (dia-1) =	0.182		1	-1.23676
												2	190	149.335	Nmax =	403		2	-0.751912
												3	199	166.806	T = ln 2/Mu	3.8085		3	-0.705632
												4	243	184.832	Teta =	-0.893818		4	-0.505875
												5	257	203.13				5	-0.44986
												6	325	221.402				6	-0.215111
												7	313.5	239.349				7	-0.251137
												8	302	256.694				8	-0.28851
												9	309.5	273.198				9	-0.263978
												10	317	288.669				10	-0.240035
												11	400	302.971				11	-0.00747201
												12	385	316.024				12	-0.0456932
												13	403	327.796				13	0
												14	397.5	338.301				14	-0.0137416
												15	392	347.586				15	-0.0276747
												16	355	355.725				16	-0.126819
												t	E9pH9T24C20	Model	No =	117		t	E9pH3T2C3
												1	117	181.766	Mu (dia-1) =	0.5154		1	-2.41942
												2	250	271.542	Nmax =	1015		2	-1.66013
												3	450	385.163	T = ln 2/Mu	1.34487		3	-1.07234
												4	850	513.489	Teta =	-2.038		4	-0.436356
												5	835	641.054				5	-0.45416
												6	1015	752.744				6	-0.258948
												7	995	840.172				7	-0.278849
												8	975	902.799				8	-0.299154
												9	857.5	944.864				9	-0.427571
												10	740	971.911				10	-0.574942
												11	780	988.817				11	-0.522298
												12	897	999.198				12	-0.382536
												13	906	1005.5				13	-0.372553
												14	1110.5	1009.31				14	-0.169026
												15	1315	1011.59				15	0
												16	1220	1012.96				16	-0.0749858

## Sheet: Umax Mean
Umax Calculation - Mean
Assay	Umax
E1pH1T2C1	0.3463
E2pH2T1C2	0.2919
E3pH1T3C1	0.2195
E4pH3T1C1	0.2785
E5pH3T2C1	0.227
E6pH1T2C3	0.4241
E7pH3T3C3	0.2398
E8pH1T3C3	0.182
E9pH3T2C3	0.5154
Mean=>>>>>	0.302722
Umax = Mu = growth velocity coefficient

## Sheet: Modeled data
time	E1pH1T2C1	E2pH2T1C2	E3pH1T3C1	E4pH3T3C1	E5pH3T2C1	E6pH1T2C3	E7pH3T3C3	E8pH1T3C3	E9pH3T2C3
1	149.818	143.945	135.603	141.881	133.339	163.385	136.022	132.667	181.766
2	186.898	173.846	155.448	169.101	150.036	220.619	155.973	149.335	271.542
3	226.558	205.769	176.147	197.827	166.669	286.229	176.321	166.806	385.163
4	266.567	238.473	197.233	227.019	182.82	355.387	196.49	184.832	513.489
5	304.615	270.592	218.207	255.563	198.119	422.127	215.922	203.13	641.054
6	338.821	300.855	238.577	282.443	212.277	481.269	234.14	221.402	752.744
7	368.054	328.275	257.908	306.875	225.095	529.843	250.789	239.349	840.172
8	391.973	352.252	275.854	328.374	236.475	567.311	265.65	256.694	902.799
9	410.86	372.576	292.179	346.763	246.402	594.836	278.642	273.198	944.864
10	425.355	389.353	306.754	362.112	254.931	614.34	289.793	288.669	971.911
11	436.242	402.903	319.553	374.665	262.162	627.811	299.213	302.971	988.817
12	444.284	413.654	330.63	384.76	268.226	636.949	307.067	316.024	999.198
13	450.154	422.065	340.095	392.771	273.262	643.075	313.543	327.796	1005.5
14	454.4	428.574	348.097	399.06	277.414	647.147	318.833	338.301	1009.31
15	457.453	433.567	354.799	403.956	280.813	649.84	323.122	347.586	1011.59
16	459.636	437.373	360.37	407.742	283.583	651.614	326.578	355.725	1012.96

## Sheet: GeneralData
	Assay	Nmax (cel.mL1x105)	µ (day−1)	T2 (day)	Pmax (cel.mL-1 x105.d-1)	Temp	ph	conc (mg.L)		Nmax (cel.mL1x105)	µ (day−1)	T2 (day)	Pmax (cel.mL-1 x105.d-1)
1	E1pH1T2C1	466	0.2909	2.38277	58.1667	24	5	12		482	0.3041	2.28364	54.6667
2	E1pH1T2C1	498	0.3173	2.18452	51.1667	24	5	12		440.25	0.29295	2.36632	66.4
3	E2pH2T1C2	448.5	0.2958	2.3433	69.8	21	7	16		397.5	0.2272	3.07465	38.5714
4	E2pH2T1C2	432	0.2901	2.38934	63	21	7	16		421.5	0.2473	2.81015	43.7143
5	E3pH1T3C1	397	0.2072	3.3453	41.2857	28	5	12		388.5	0.1315	5.27256	57.5714
6	E3pH1T3C1	398	0.2472	2.80399	35.8571	28	5	12		562	0.36035	1.92591	107.6
7	E4pH3T1C1	426.5	0.2347	2.95333	46.4286	21	9	12		341.25	0.2138	3.27547	26.4444
8	E4pH3T1C1	416.5	0.2599	2.66698	41	21	9	12		326	0.18395	3.80435	28.3
9	E5pH3T2C1	476	0.1293	5.36077	62.7143	24	9	12		1015	0.4815	1.44966	179.6
10	E5pH3T2C1	301	0.1337	5.18435	52.4286	24	9	12		421.5	0.2473	2.81015	54.6667
11	E6pH1T2C3	581	0.373	1.8583	106	24	5	20
12	E6pH1T2C3	543	0.3477	1.99352	109.2	24	5	20
13	E7pH3T3C3	351.5	0.1922	3.60638	29	28	9	20
14	E7pH3T3C3	331	0.2354	2.94455	23.8889	28	9	20
19	E8pH1T3C3	331	0.166	4.17559	30.9	28	5	20
20	E8pH1T3C3	321	0.2019	3.43312	25.7	28	5	20
21	E9pH3T2C3	1027	0.5217	1.32863	182	24	9	20
22	E9pH3T2C3	1003	0.4413	1.57069	177.2	24	9	20
	Nmax (cel.mL1x105)	maximum estimated cell count
	µ (day−1)	daily growth rate
	T2 (day)	doubling time
	Pmax (cel.mL-1 x105.d-1)	maximum yield
	Temp	cultivation temperature
	ph	cultivation pH
	conc	nutrient concentration
